# Supplementary material
Source: publisher figshare collection journal article supplement (https://acs.figshare.com/ndownloader/files/4209859)
Supplement: Supplementary file 1 [file 4209859]

**The role of titanium dioxide nanoparticles in the elevated uptake and retention of cadmium and zinc in *Daphnia magna***

Cheng Tan<sup>1,2</sup>, Wen-Hong Fan<sup>1</sup> and Wen-Xiong Wang<sup>2,\*</sup>

<sup>1</sup>*Department of Environmental Science and Engineering, Beihang University, Beijing 100083, China*

<sup>2</sup>*Division of Life Science, The Hong Kong University of Science and Technology (HKUST), Clear Water Bay, Kowloon, Hong Kong*

Number of Pages: 7

Number of Tables: 1 (Table S1)

Number of Figures: 9 (Figure S1 to Figure S9)

## Detailed Method:

### *Quantify nano-TiO<sub>2</sub> concentration in daphnids*

After exposure, for each replicate, 20 daphnids were removed and rinsed in M7 medium for about 2 min. The daphnids were subsequently dried in an oven at 80 °C to a constant weight, and then digested in 4 mL concentrated HNO<sub>3</sub> with the addition of 1 mL of hydrogen peroxide to aid tissue digestion. The digests were evaporated to dryness at 110 °C. The TiO<sub>2</sub> concentrations in the digested samples were then determined using the method described by Zhang et al (24). In brief, TiO<sub>2</sub> released by digestion were decomposed into titanium (IV) ion by heating with 1 ml of the sulphuric acid-ammonium sulphate solution. After cooling down, the above solution was transferred quantitatively to a 25 ml volumetric flask. TiO<sub>2</sub> concentration in digested samples was determined by ICP-AES (IRIS Intrepid- II). The recovery for this TiO<sub>2</sub> quantification technique was ranged from 88% to 107%.

(24) Zhang, X.; Sun, H.; Zhang, Z.; Niu, Q.; Chen, Y.; Crittenden, J.C. Enhanced bioaccumulation of cadmium in carp in the presence of titanium dioxide nanoparticles. *Chemosphere*, , **2007**, 67, 160 – 166.

Table S1. Experimental purposes, time conditions and main results

| Experiment    | Purpose                                                                                                                   | Exp. Time | Dep. Time | Main results                                                                        | Compare with dissolved phase                       |
|---------------|---------------------------------------------------------------------------------------------------------------------------|-----------|-----------|-------------------------------------------------------------------------------------|----------------------------------------------------|
| <b>Uptake</b> | Quantify the influx rate of Cd and Zn adsorbed on nano-TiO <sub>2</sub> in <i>D. magna</i> .                              | 3 h       | none      | ( $k_u$ : L/g/h)<br>Cd: 5.07±0.79<br>Zn: 8.37±0.97                                  | Cd: 80.6 times higher<br>Zn: 185 times higher (26) |
| <b>AE</b>     | Quantify the influences of nano-TiO <sub>2</sub> concentrations on Cd and Zn assimilation efficiency in <i>D. magna</i> . | 15 min    | 48 h      | (AE: %)<br>Cd:<br>44.5±2.4-24.6±3.7<br>Zn:<br>51.8±5.0-30.4±3.4                     |                                                    |
| <b>Efflux</b> | Quantify the efflux rate of Cd and Zn adsorbed on nano-TiO <sub>2</sub> in <i>D. magna</i> .                              | 3 d       | 7 d       | ( $k_e$ : /d)<br>Cd: 0.0377±0.008<br>0.0383±0.018<br>Zn: 0.087±0.019<br>0.091±0.022 | Cd: 70% lower<br>Zn: 62% lower                     |

a.\*Exp.=Exposure and Dep.=Depuration.

b. Values in table S1 are 95% confidence intervals.

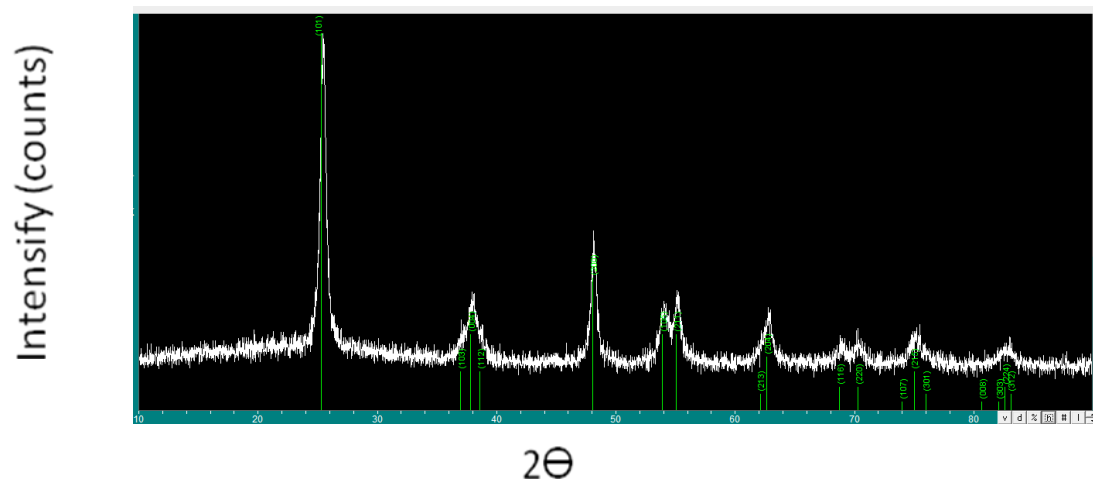

Figure S1. X-ray diffraction (XRD) pattern of purchased commercial titanium dioxide nanoparticles (white curve) compared with standard reference data for titanium dioxide of anatase (green lines, number: 21-1272, space group:  $2/m/2$ ).

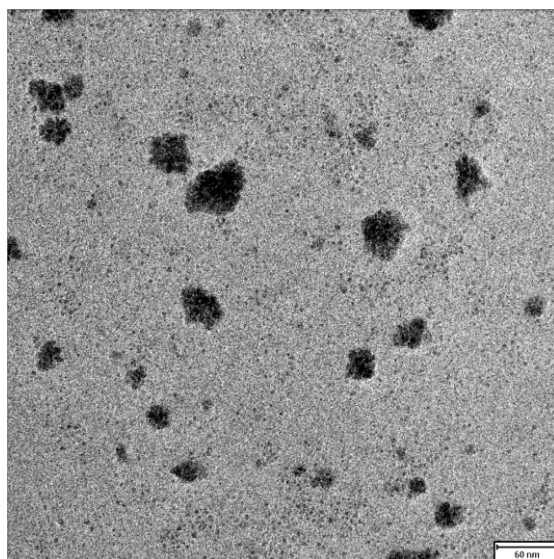

Figure S2. Transmission electron microscopy (TEM) images of titanium dioxide nanoparticles in the SM7 medium.

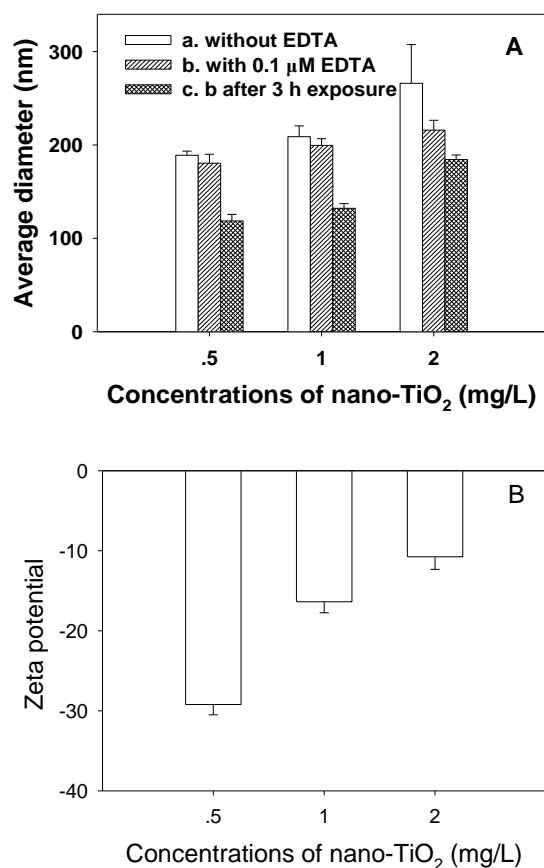

Figure S3. (A) Average diameters of nano-TiO<sub>2</sub> (0.5 to 2 mg/L) in simplified Elendt M7 medium without EDTA, with 0.1  $\mu$ M EDTA, and with 0.1  $\mu$ M EDTA after 3 h exposure according to the DLS data. (B) Zeta potential of nano-TiO<sub>2</sub> (0.5 to 2 mg/L) in simplified Elendt M7 medium.

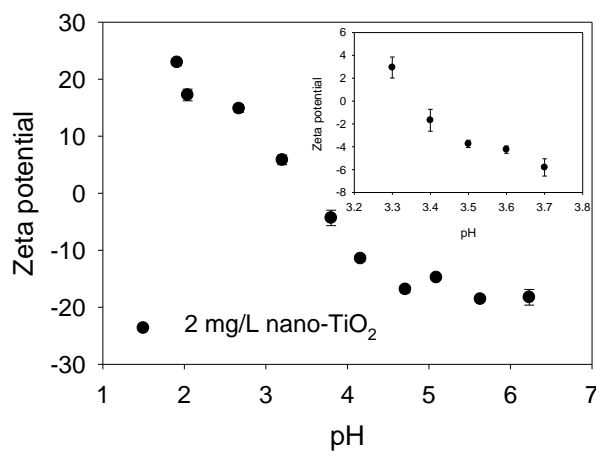

Figure S4. The relationship between zeta potential and pH of 2 mg/L nano-TiO<sub>2</sub> in simplified Elendt M7 medium.

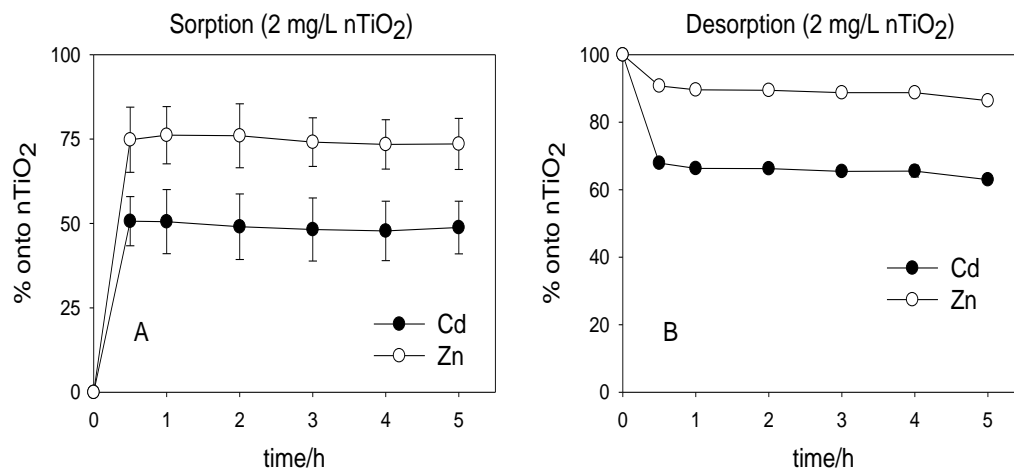

Figure S5. (A) Sorption kinetics of <sup>109</sup>Cd and <sup>65</sup>Zn on nano-TiO<sub>2</sub>. (B) Desorption kinetics of <sup>109</sup>Cd and <sup>65</sup>Zn from nano-TiO<sub>2</sub>. Values are mean ± SD (n=3).

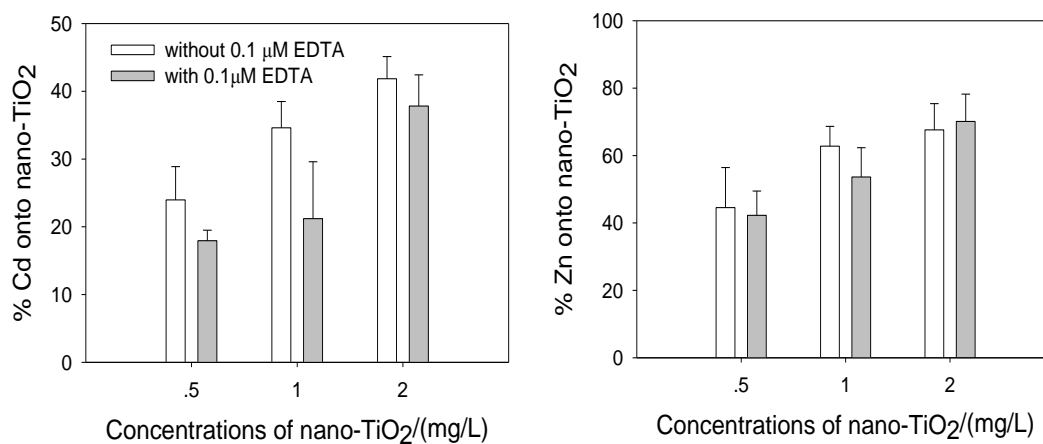

Figure S6. The percentages of Cd (A) and Zn (B) adsorbed onto nano-TiO<sub>2</sub> in simplified Elendt M7 medium with and without 0.1 μM EDTA. Values are mean ± SD (n=3).

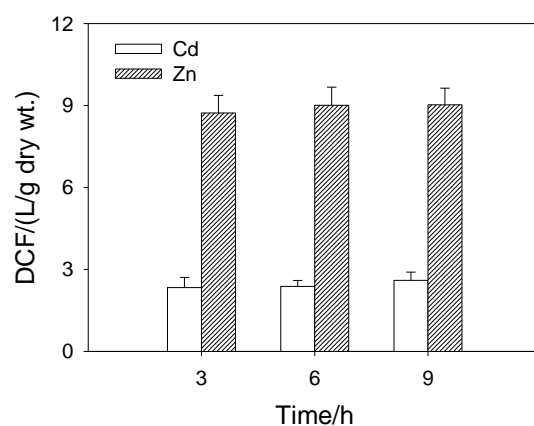

Figure S7. The uptake of  $^{109}\text{Cd}$  and  $^{65}\text{Zn}$  adsorbed on 1 mg/L nano- $\text{TiO}_2$  in *D.magna* during the 9-h exposure, and the exposure medium was renewed at 3 and 6 h. Values are mean  $\pm$  SD (n=3).

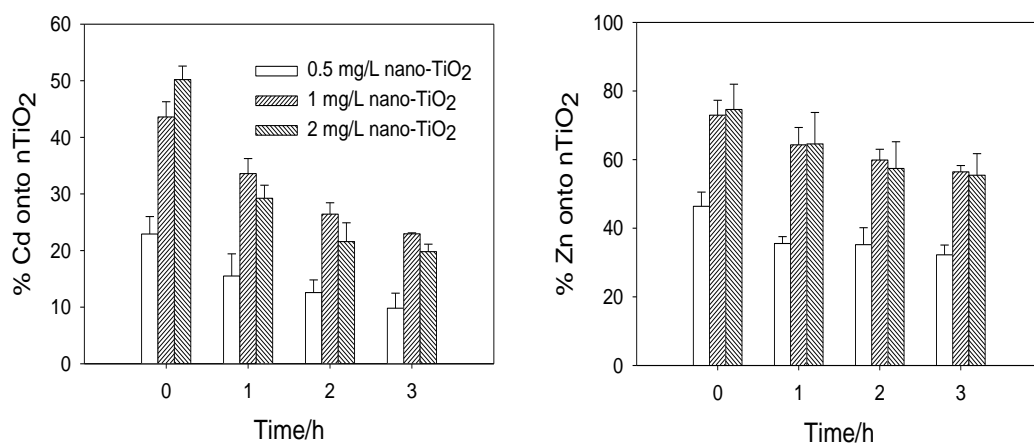

Figure S8. (A) and (B) Percentages of Cd and Zn adsorbed on nano- $\text{TiO}_2$  (0.5, 1, and 2 mg/L) during the 3-h exposure in simplified Elendt M7 medium containing 0.1  $\mu\text{M}$  EDTA. Values are mean  $\pm$  SD (n=3).

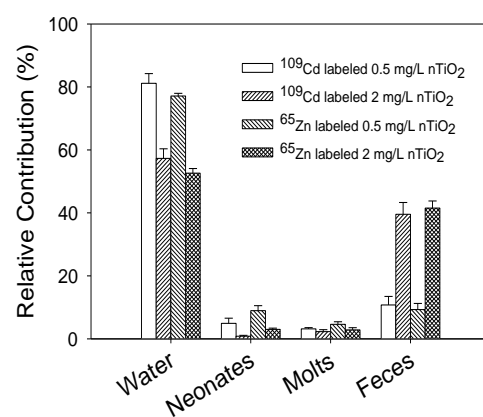

Figure S9. The relative contributions of metal loss from *D. magna* during the 7-day depuration period. Values are mean  $\pm$  SD (n=3).
